# Supplementary material
Source: PubMed Central journal article supplement (PMC4390388)

**rs1010, P-het=0.493**

TAMPERE

SEARCH

UKGPCS

STHM1

ESTHER

MOFFITT

PCMUS

UTAH

ULM

FHCRC

MAYO

QLD

EPIC-Norfolk

CPCS1

CPCS2

MCCS

Protect

IPO-Porto

MEC

CAPS

EPIC

Poland

ProMPT

**European**

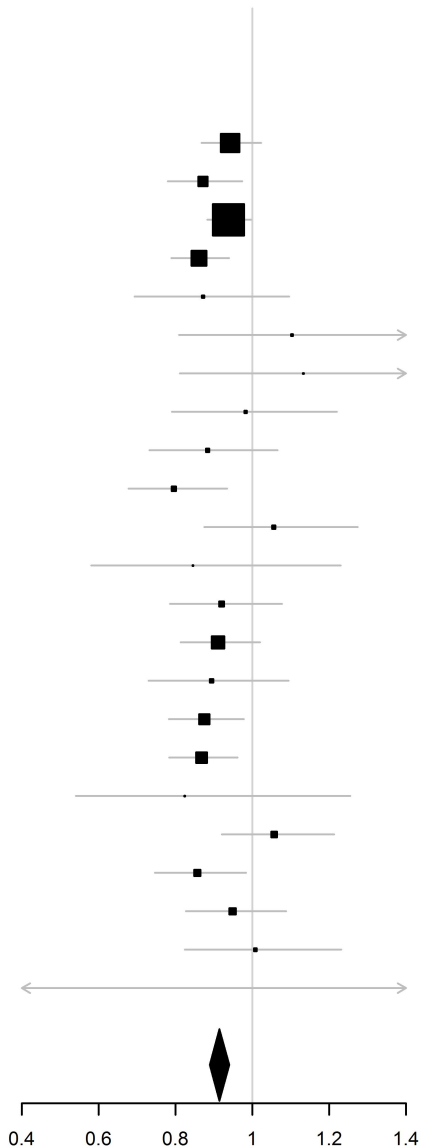

**rs1043853, P-het=0.614**

TAMPERE

SEARCH

UKGPCS

STHM1

ESTHER

MOFFITT

PCMUS

UTAH

ULM

FHCRC

MAYO

QLD

EPIC-Norfolk

CPCS1

CPCS2

MCCS

Protect

IPO-Porto

MEC

CAPS

EPIC

Poland

ProMPT

**European**

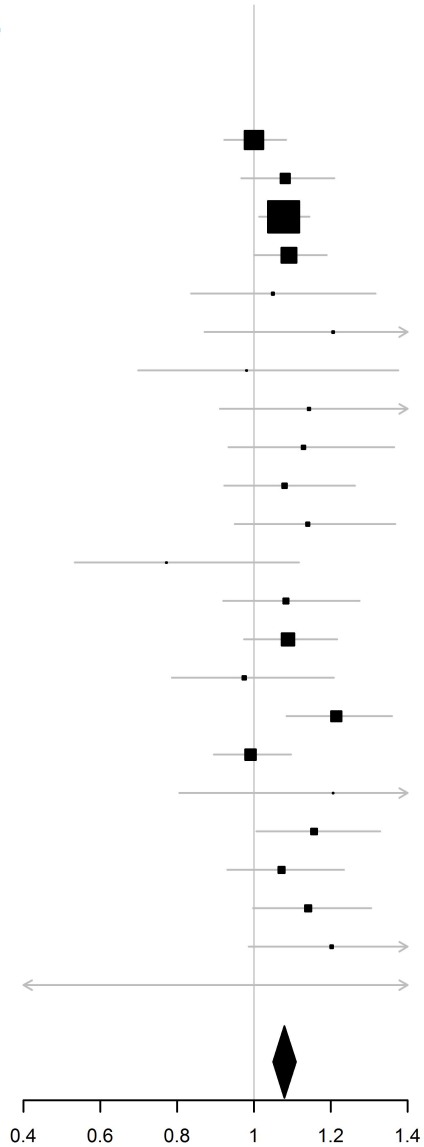

**rs1058205, P-het=<0.001**

TAMPERE

SEARCH

UKGPCS

STHM1

ESTHER

MOFFITT

PCMUS

UTAH

ULM

FHCRC

MAYO

QLD

EPIC-Norfolk

CPCS1

CPCS2

MCCS

Protect

IPO-Porto

MEC

CAPS

EPIC

Poland

ProMPT

**European**

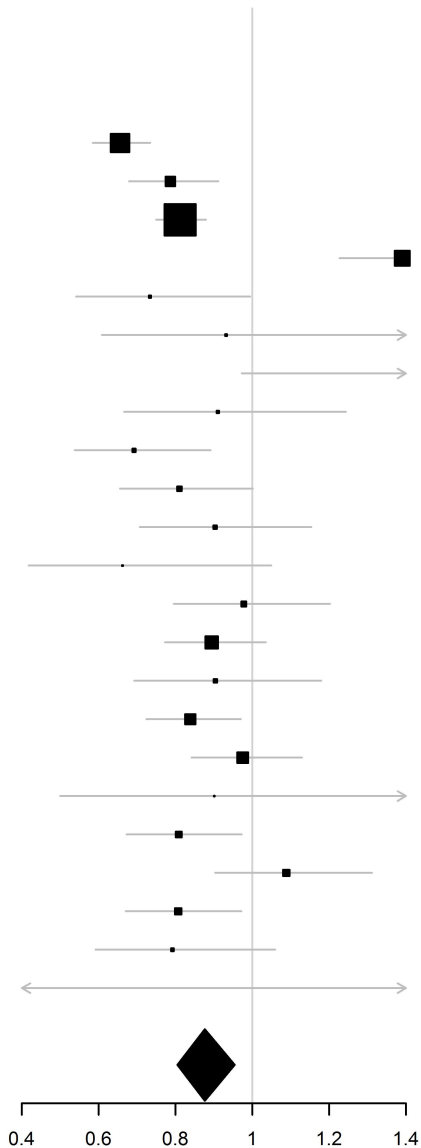

**rs12492606, P-het=0.629**

TAMPERE

SEARCH

UKGPCS

STHM1

ESTHER

MOFFITT

PCMUS

UTAH

ULM

FHCRC

MAYO

QLD

EPIC-Norfolk

CPCS1

CPCS2

MCCS

Protect

IPO-Porto

MEC

CAPS

EPIC

Poland

ProMPT

**European**

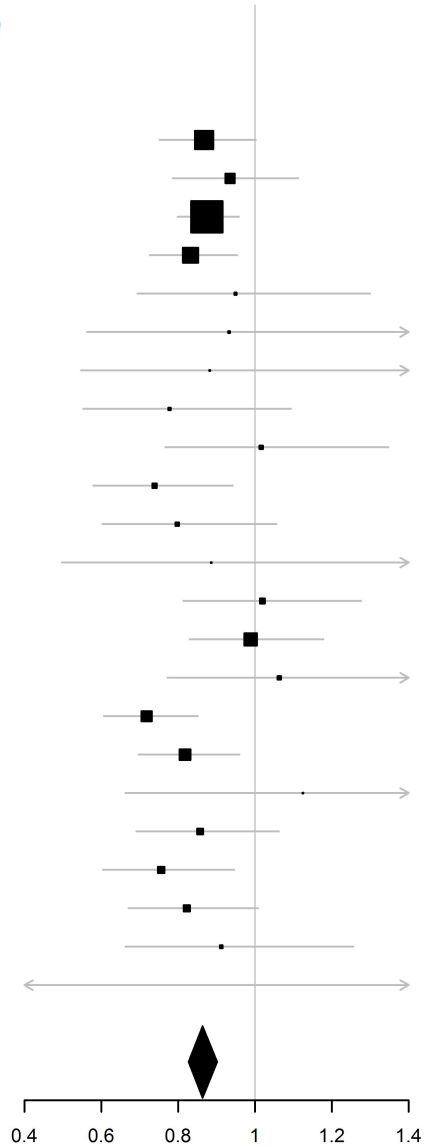

**rs12573077, P-het=0.95**

TAMPERE

SEARCH

UKGPCS

STHM1

ESTHER

MOFFITT

PCMUS

UTAH

ULM

FHCRC

MAYO

QLD

EPIC-Norfolk

CPCS1

CPCS2

MCCS

Protect

IPO-Porto

MEC

CAPS

EPIC

Poland

ProMPT

**European**

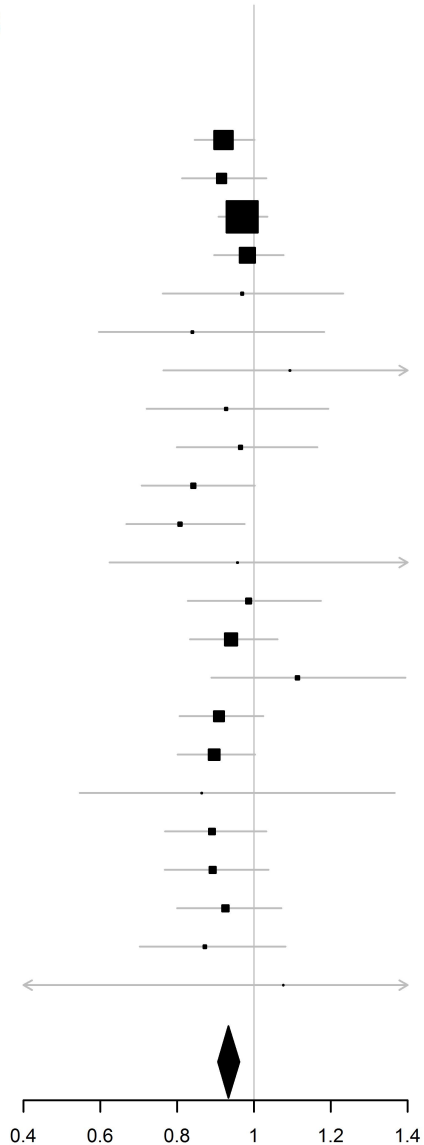

**rs14082, P-het=0.589**

TAMPERE

SEARCH

UKGPCS

STHM1

ESTHER

MOFFITT

PCMUS

UTAH

ULM

FHCRC

MAYO

QLD

EPIC-Norfolk

CPCS1

CPCS2

MCCS

Protect

IPO-Porto

MEC

CAPS

EPIC

Poland

ProMPT

**European**

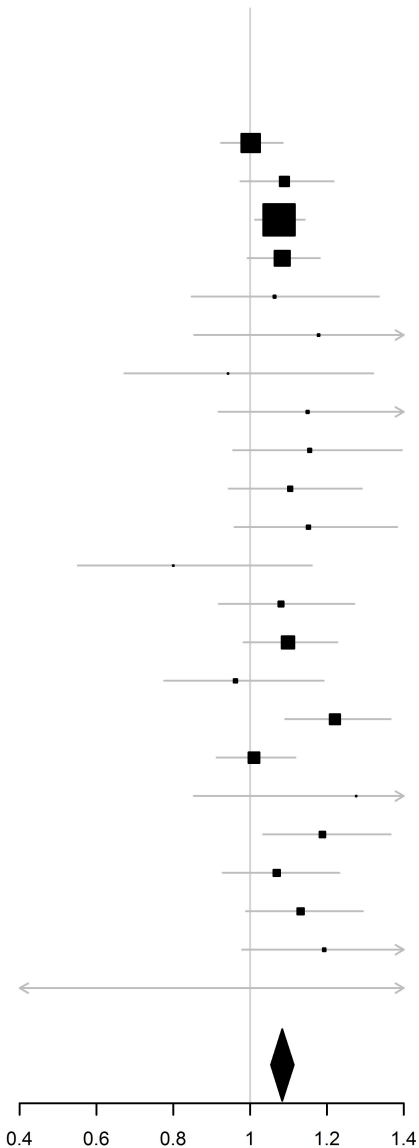

**rs1530865, P-het=0.507**

TAMPERE  
SEARCH  
UKGPCS  
STHM1  
ESTHER  
MOFFITT  
PCMUS  
UTAH  
ULM  
FHCRC  
MAYO  
QLD  
EPIC-Norfolk  
CPCS1  
CPCS2  
MCCS  
Protect  
IPO-Porto  
MEC  
CAPS  
EPIC  
Poland  
ProMPT

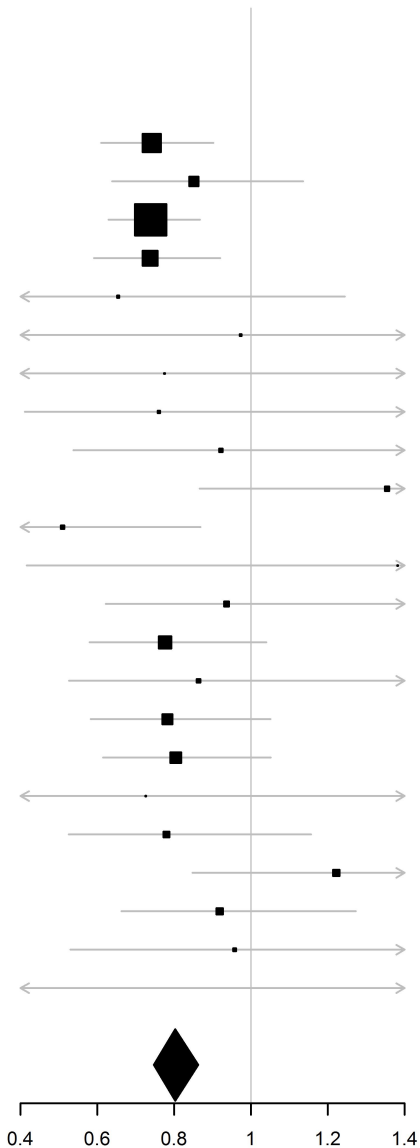

**rs1567669, P-het=0.049**

TAMPERE  
SEARCH  
UKGPCS  
STHM1  
ESTHER  
MOFFITT  
PCMUS  
UTAH  
ULM  
FHCRC  
MAYO  
QLD  
EPIC-Norfolk  
CPCS1  
CPCS2  
MCCS  
ProtectT  
IPO-Porto  
MEC  
CAPS  
EPIC  
Poland  
ProMPT

**European**

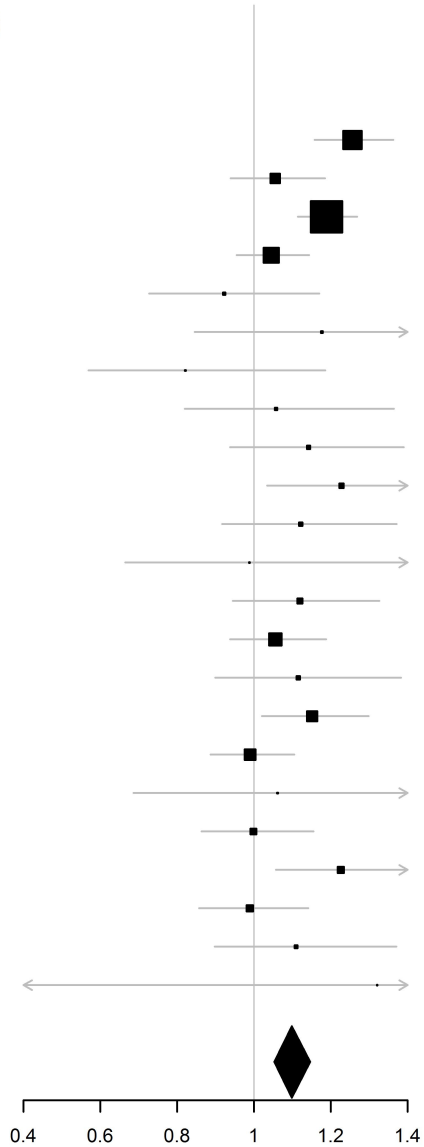



rs17664, P-het=0.049

TAMPERE

SEARCH

UKGPCS

STHM1

ESTHER

MOFFITT

PCMUS

UTAH

ULM

FHCRC

MAYO

QLD

EPIC-Norfolk

CPCS1

CPCS2

MCCS

Protect

IPO-Porto

MEC

CAPS

EPIC

Poland

ProMPT

**European**

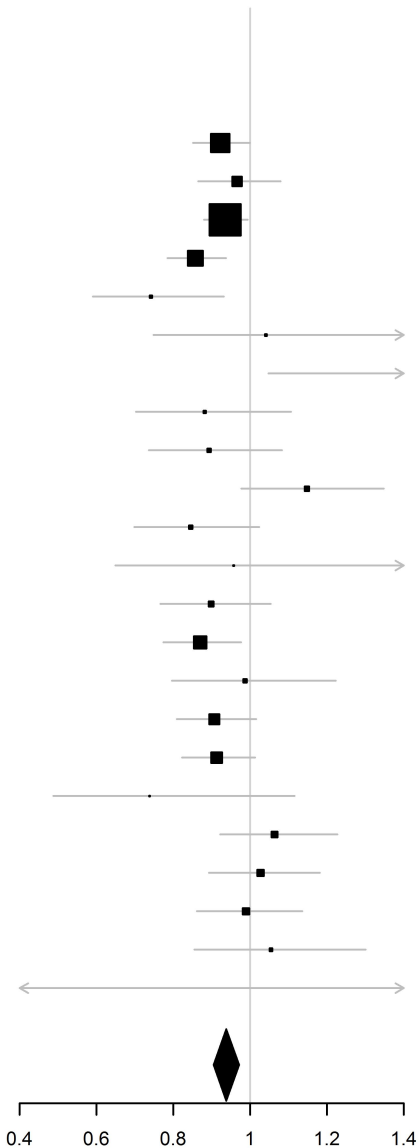

**rs1810126, P-het=0.141**

TAMPERE

SEARCH

UKGPCS

STHM1

ESTHER

MOFFITT

PCMUS

UTAH

ULM

FHCRC

MAYO

QLD

EPIC-Norfolk

CPCS1

CPCS2

MCCS

Protect

IPO-Porto

MEC

CAPS

EPIC

Poland

ProMPT

**European**

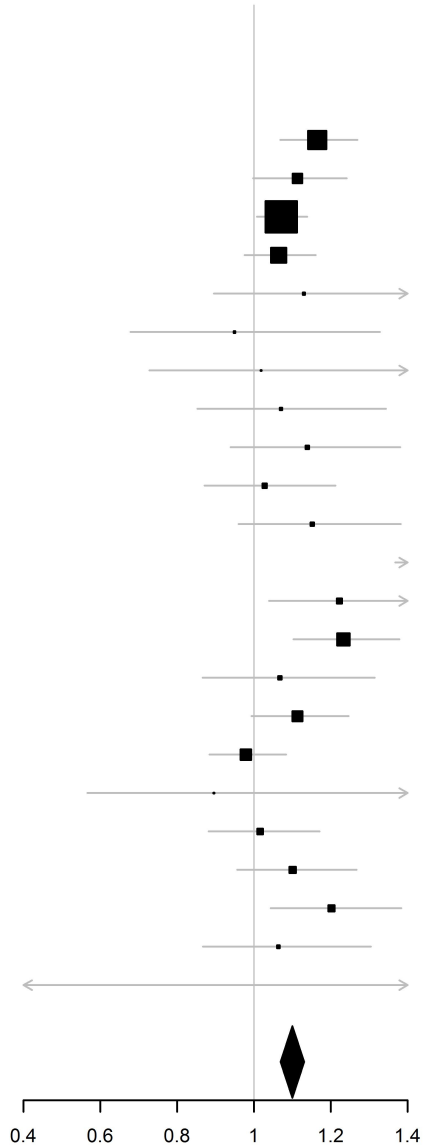

rs2357637, P-het=0.291

TAMPERE

SEARCH

UKGPCS

STHM1

ESTHER

MOFFITT

PCMUS

UTAH

ULM

FHCRC

MAYO

QLD

EPIC-Norfolk

CPCS1

CPCS2

MCCS

Protect

IPO-Porto

MEC

CAPS

EPIC

Poland

ProMPT

**European**

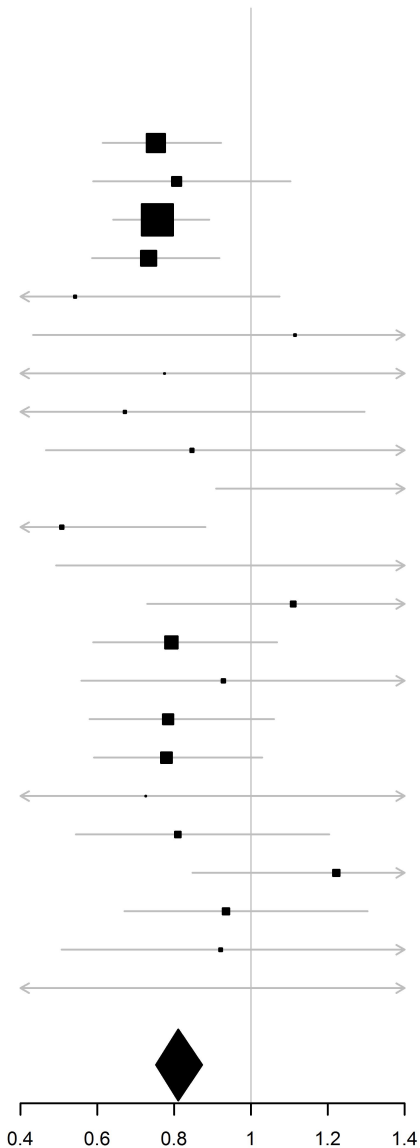

rs2450975, P-het=0.015

TAMPERE

SEARCH

UKGPCS

STHM1

ESTHER

MOFFITT

PCMUS

UTAH

ULM

FHCRC

MAYO

QLD

EPIC-Norfolk

CPCS1

CPCS2

MCCS

Protect

IPO-Porto

MEC

CAPS

EPIC

Poland

ProMPT

**European**

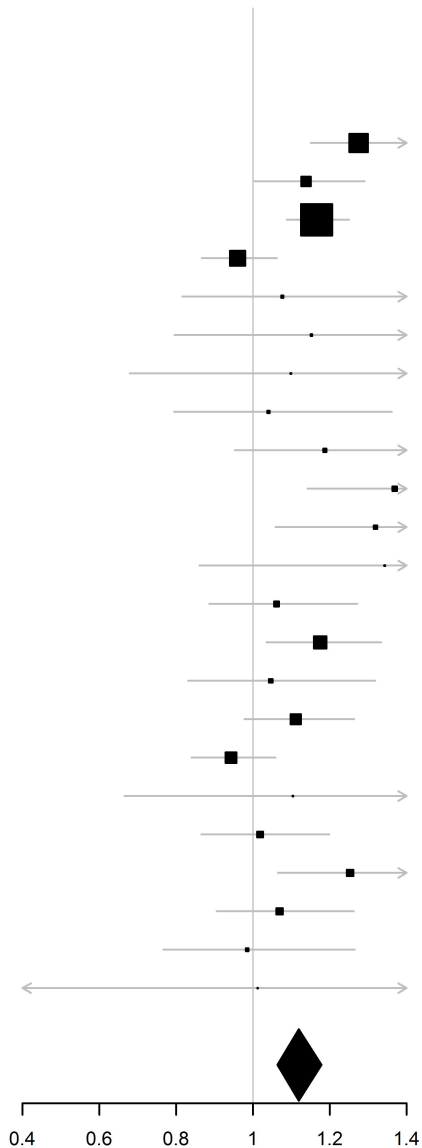

**rs2647257, P-het=0.869**

TAMPERE

SEARCH

UKGPCS

STHM1

ESTHER

MOFFITT

PCMUS

UTAH

ULM

FHCRC

MAYO

QLD

EPIC-Norfolk

CPCS1

CPCS2

MCCS

Protect

IPO-Porto

MEC

CAPS

EPIC

Poland

ProMPT

**European**

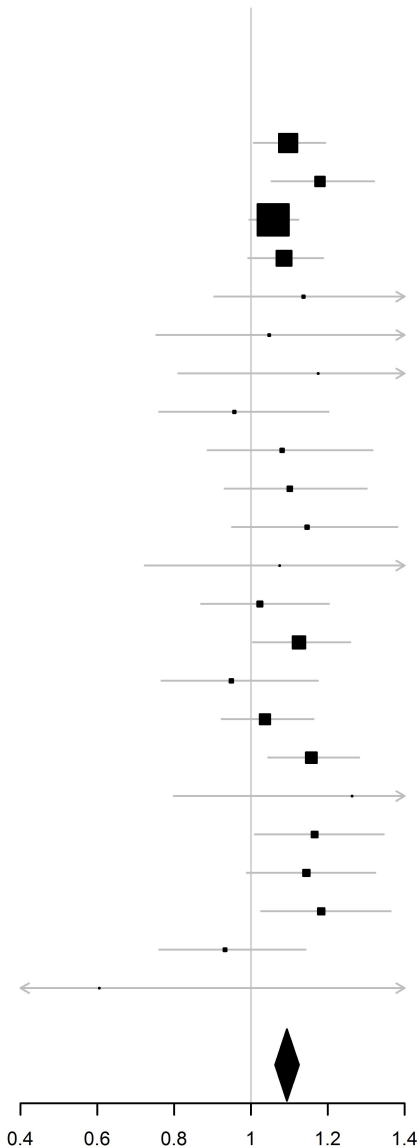

**rs3103353, P-het=0.601**

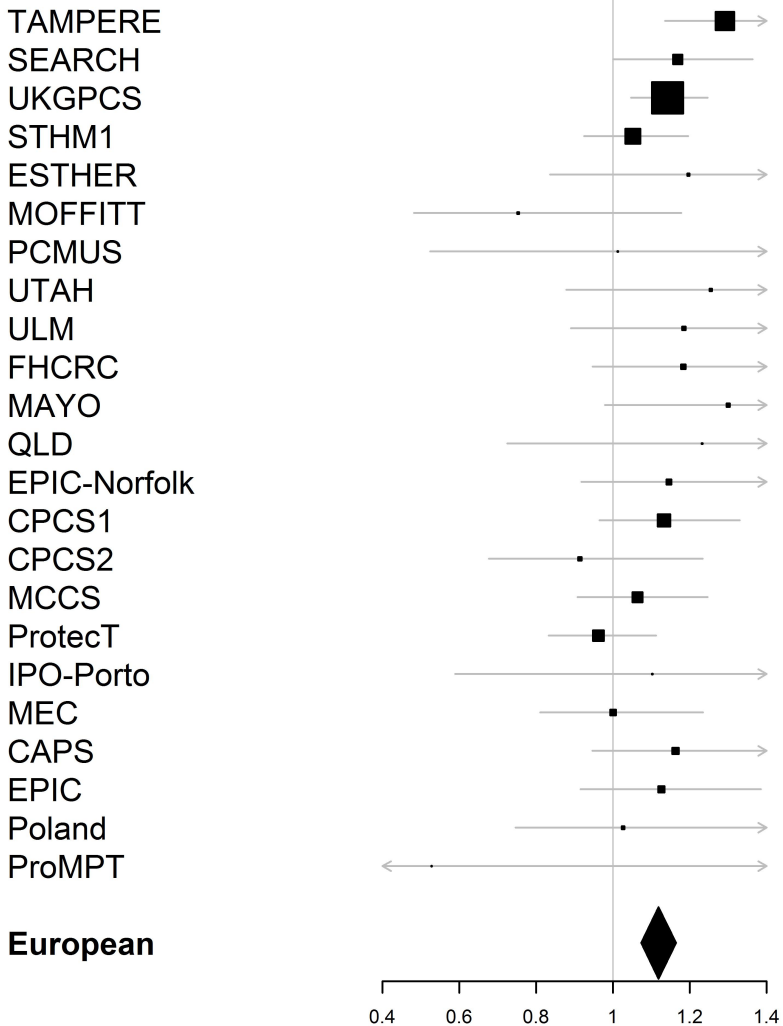

**rs311497, P-het=0.343**

TAMPERE

SEARCH

UKGPCS

STHM1

ESTHER

MOFFITT

PCMUS

UTAH

ULM

FHCRC

MAYO

QLD

EPIC-Norfolk

CPCS1

CPCS2

MCCS

Protect

IPO-Porto

MEC

CAPS

EPIC

Poland

ProMPT

**European**

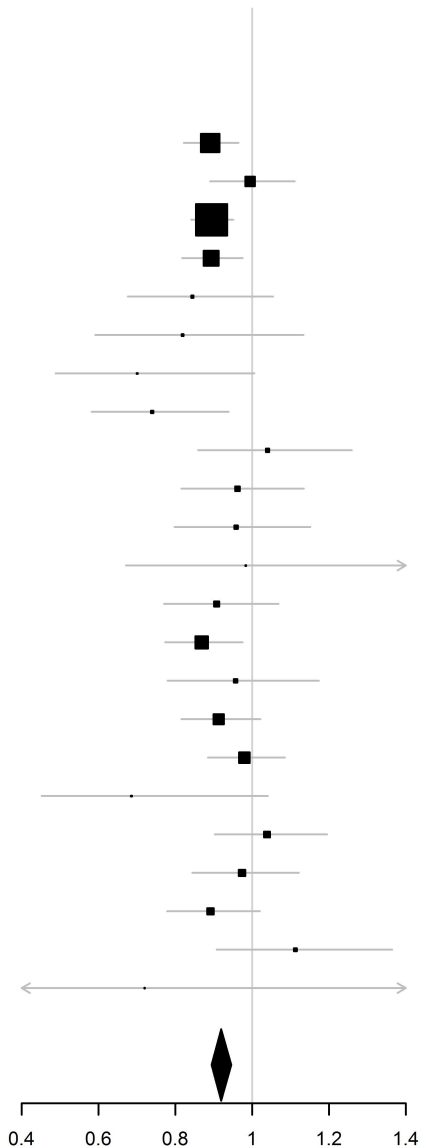

**rs3127593, P-het=0.631**

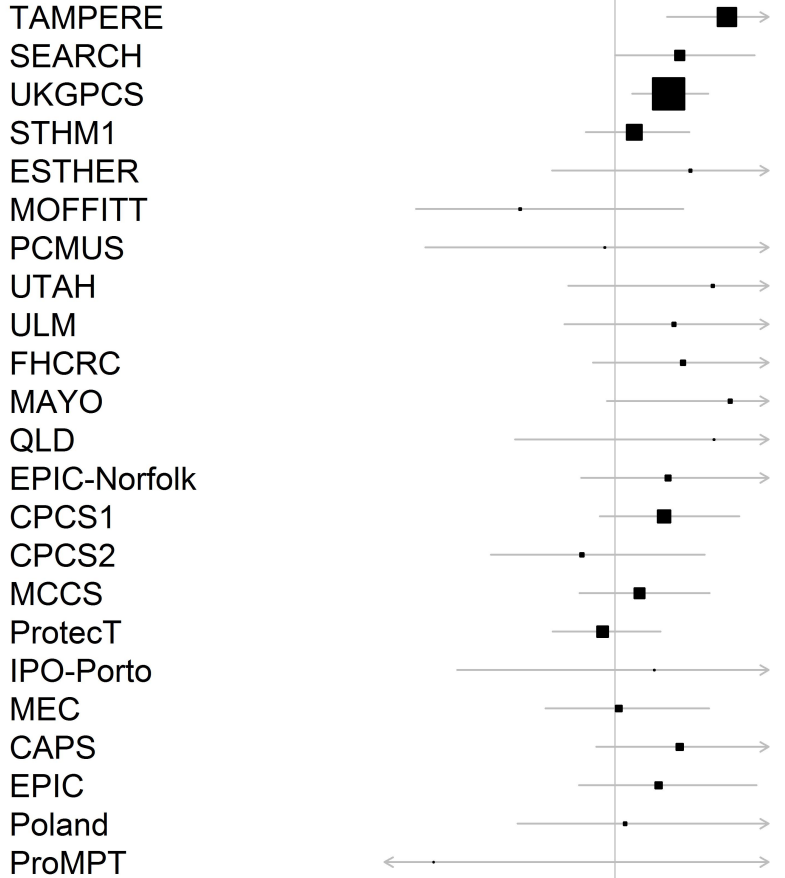

**European**

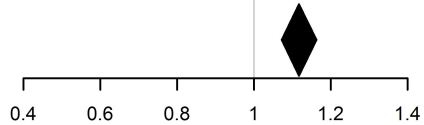



**rs4233979, P-het=0.048**

TAMPERE

SEARCH

UKGPCS

STHM1

ESTHER

MOFFITT

PCMUS

UTAH

ULM

FHCRC

MAYO

QLD

EPIC-Norfolk

CPCS1

CPCS2

MCCS

Protect

IPO-Porto

MEC

CAPS

EPIC

Poland

ProMPT

**European**

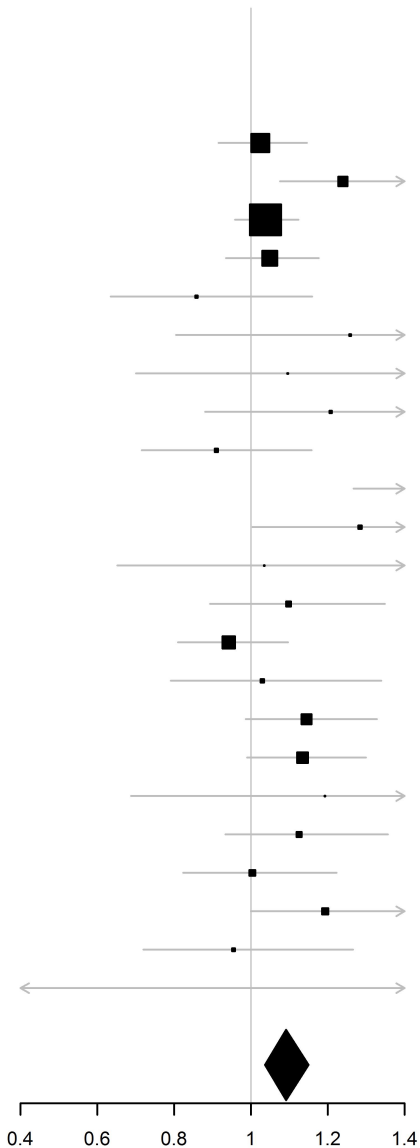

**rs4245739, P-het=0.722**

TAMPERE  
SEARCH  
UKGPCS  
STHM1  
ESTHER  
MOFFITT  
PCMUS  
UTAH  
ULM  
FHCRC  
MAYO  
QLD  
EPIC-Norfolk  
CPCS1  
CPCS2  
MCCS  
Protect  
IPO-Porto  
MEC  
CAPS  
EPIC  
Poland  
ProMPT

**European**

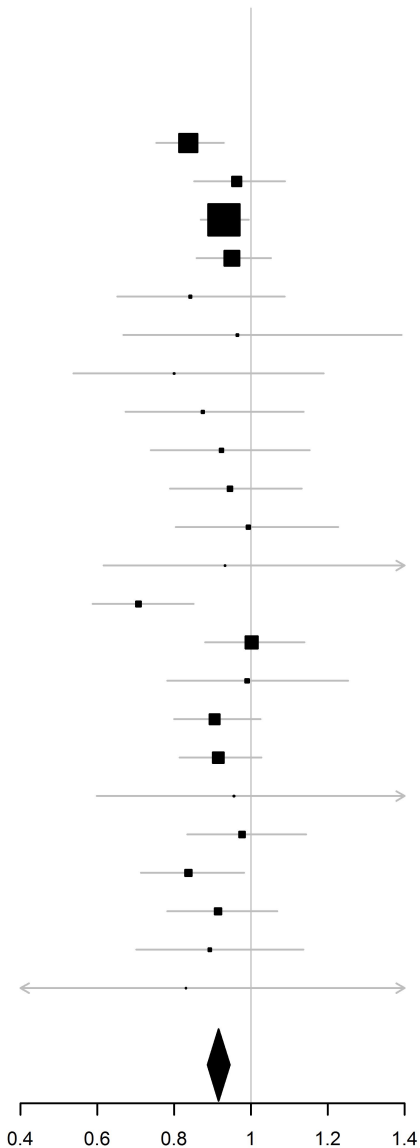

**rs47340, P-het=0.198**

TAMPERE

SEARCH

UKGPCS

STHM1

ESTHER

MOFFITT

PCMUS

UTAH

ULM

FHCRC

MAYO

QLD

EPIC-Norfolk

CPCS1

CPCS2

MCCS

Protect

IPO-Porto

MEC

CAPS

EPIC

Poland

ProMPT

**European**

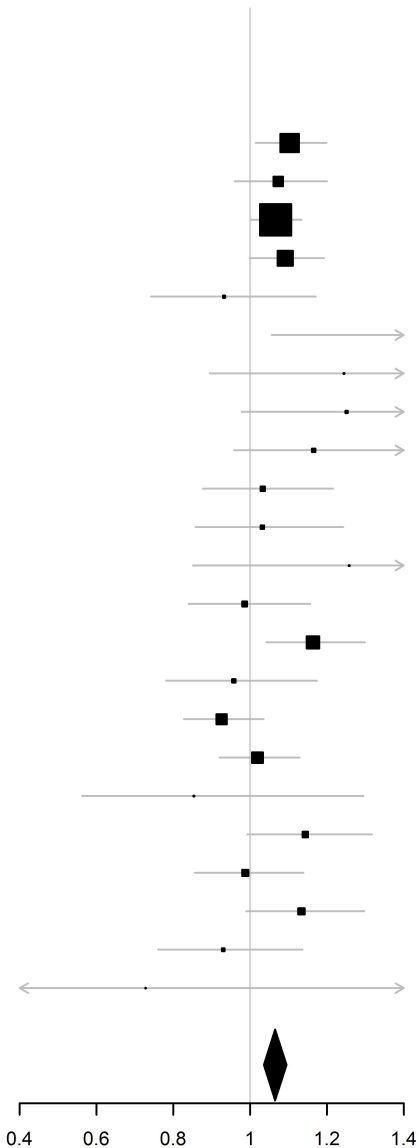

rs7402, P-het=0.642

TAMPERE

SEARCH

UKGPCS

STHM1

ESTHER

MOFFITT

PCMUS

UTAH

ULM

FHCRC

MAYO

QLD

EPIC-Norfolk

CPCS1

CPCS2

MCCS

Protect

IPO-Porto

MEC

CAPS

EPIC

Poland

ProMPT

**European**

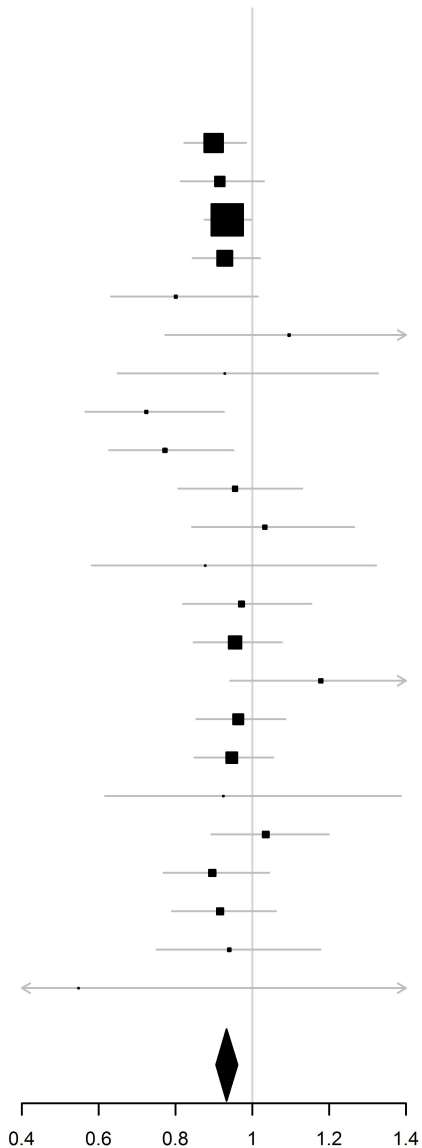

**rs7615039, P-het=0.654**

TAMPERE

SEARCH

UKGPCS

STHM1

ESTHER

MOFFITT

PCMUS

UTAH

ULM

FHCRC

MAYO

QLD

EPIC-Norfolk

CPCS1

CPCS2

MCCS

Protect

IPO-Porto

MEC

CAPS

EPIC

Poland

ProMPT

**European**

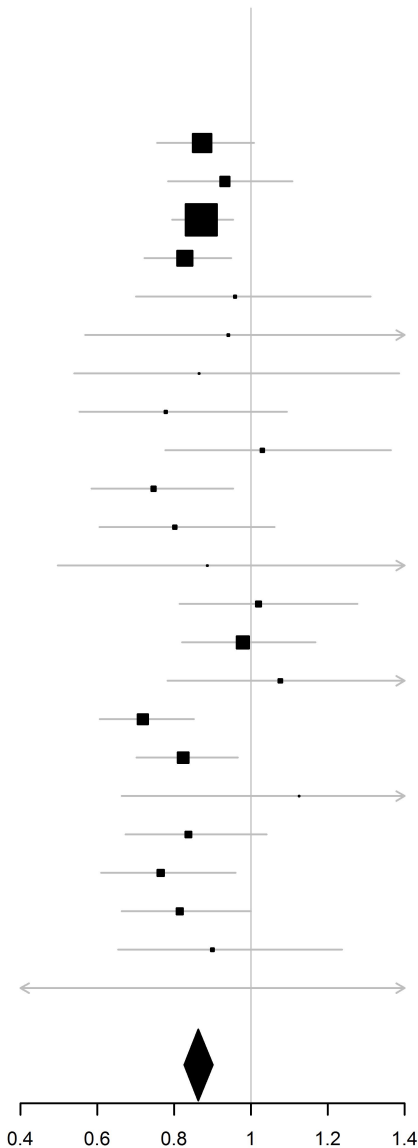

**rs879161, P-het=0.598**

TAMPERE

SEARCH

UKGPCS

STHM1

ESTHER

MOFFITT

PCMUS

UTAH

ULM

FHCRC

MAYO

QLD

EPIC-Norfolk

CPCS1

CPCS2

MCCS

Protect

IPO-Porto

MEC

CAPS

EPIC

Poland

ProMPT

**European**

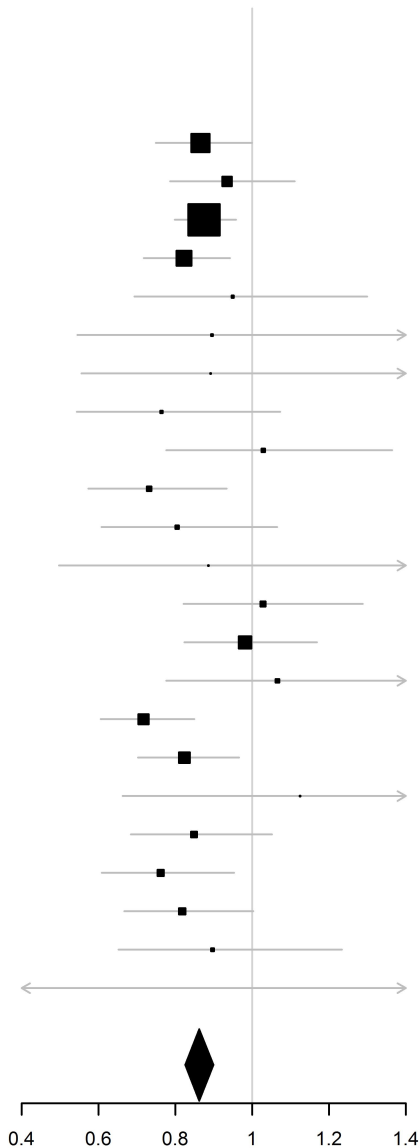

Supplement: NIHMS62173-supplement-1.pdf [file NIHMS62173-supplement-1.pdf]
